# Supplementary material for: Expression, Regulation, and Function of β-Defensins in the Bovine Mammary Glands: Current Knowledge and Future Perspectives
Source: MDPI journal article supplement (doi:10.3390/ani13213372), 2023-10-31
Supplement: s1 [file s1]

**Table S1.** The impact of various pathogens or derived virulence factors on the expression of  $\beta$ -defensins' genes and proteins, as well as the tests employed in different studies.

| Study | Pathogen (or derived virulence factor)                                                                                    | Evaluated $\beta$ -defensins <sup>1</sup>                                             | Effect                                 | Test                             | Sampling sites/ Evaluated cells                                                                                             | Study type                     |
|-------|---------------------------------------------------------------------------------------------------------------------------|---------------------------------------------------------------------------------------|----------------------------------------|----------------------------------|-----------------------------------------------------------------------------------------------------------------------------|--------------------------------|
| [19]  | Subclinical mastitis                                                                                                      | LAP<br>DEFB1<br>BNBD3                                                                 | detected                               | RT-PCR <sup>2</sup>              | Parenchymal and cistern tissue                                                                                              | <i>in vivo</i> -N <sup>3</sup> |
|       | Purulent mastitis caused by <i>Actinomyces pyogenes</i>                                                                   | LAP<br>DEFB401<br>BNBD9<br>BNBD12                                                     |                                        |                                  |                                                                                                                             |                                |
|       | Bloody mixed infection                                                                                                    | DEFB1                                                                                 |                                        |                                  |                                                                                                                             |                                |
|       | Affected udder half, mixed infection                                                                                      | LAP<br>BNBD9                                                                          |                                        |                                  |                                                                                                                             |                                |
|       | Purulent mixed infection                                                                                                  | LAP                                                                                   |                                        |                                  |                                                                                                                             |                                |
|       |                                                                                                                           |                                                                                       |                                        |                                  |                                                                                                                             |                                |
| [28]  | <i>S. uberis</i>                                                                                                          | LAP                                                                                   | $\uparrow^4$                           | In situ hybridization/<br>RT-PCR | Epithelium from the cisternal, alveolar, and peripheral regions                                                             | <i>in vivo</i> -E <sup>5</sup> |
|       | <i>Staphylococcus</i> species<br><i>Corynebacterium</i> species<br><i>S. aureus</i>                                       | LAP                                                                                   | $\uparrow$                             | In situ hybridization/<br>RT-PCR | Epithelium from the cisternal, alveolar, and peripheral regions                                                             | <i>in vivo</i> -N              |
|       |                                                                                                                           |                                                                                       |                                        |                                  |                                                                                                                             |                                |
| [26]  | <i>A. pyogenes</i><br><i>E. coli</i><br><i>S. aureus</i><br><i>S. dysgalactiae</i><br><i>S. canis</i><br><i>S. uberis</i> | BNBD5                                                                                 | $\uparrow$                             | In situ hybridization/<br>RT-PCR | Deeper area of udder quarter/mammary epithelial cell                                                                        | <i>in vivo</i> -N              |
| [52]  | LPS<br>LTA                                                                                                                | $\beta$ -defensin ( $\beta$ -defensin sequences revealed the presence of LAP and TAP) | $\uparrow$ (Response to LTA was lower) | qRT-PCR <sup>6</sup>             | BMECs <sup>7</sup>                                                                                                          | <i>ex vivo</i>                 |
| [100] | <i>S. aureus</i>                                                                                                          | $\beta$ -defensins                                                                    | $\uparrow$                             | RT-PCR                           | BMECs                                                                                                                       | <i>ex vivo</i>                 |
| [56]  | <i>E. coli</i>                                                                                                            | $\beta$ -defensins (universal defensin)                                               | $\uparrow$                             | qRT-PCR                          | A deeper area of the udder quarter, 10 cm dorsal of the milk cistern/ regional udder lymph nodes and peripheral lymph nodes | <i>in vivo</i> -E              |
|       |                                                                                                                           | BNBD5                                                                                 | $\uparrow$                             |                                  |                                                                                                                             |                                |
|       | <i>S. aureus</i>                                                                                                          | $\beta$ -defensins (universal defensin)                                               | $\leftrightarrow$                      | qRT-PCR                          |                                                                                                                             |                                |

|      |                         |                                                 |         |                                           |                                                        |                   |
|------|-------------------------|-------------------------------------------------|---------|-------------------------------------------|--------------------------------------------------------|-------------------|
|      |                         | BNBD5                                           | ↔       |                                           |                                                        |                   |
|      | <i>E. coli</i>          | LAP                                             | Induced | IHC                                       | BMECs                                                  | <i>in vivo</i> -E |
| [61] | <i>E. coli</i>          | LAP<br>DEFB1<br>BNBD4                           | ↑       | Affymetrix DNA-<br>microarrays<br>qRT-PCR | BMECs                                                  | <i>ex vivo</i>    |
| [51] | LPS                     | LAP                                             | ↑       | ELISA                                     | Milk                                                   | <i>in vivo</i> -E |
| [11] | Live <i>S. aureus</i>   | TAP                                             | ↓       | RT-PCR                                    | BMECs                                                  | <i>ex vivo</i>    |
|      | Killed <i>S. aureus</i> |                                                 | ↑       |                                           |                                                        |                   |
| [89] | <i>S. aureus</i>        | TAP<br>B-defensin                               | ↔       | RT-PCR                                    | BMECs                                                  | <i>ex vivo</i>    |
| [50] | <i>E. coli</i>          | LAP<br>TAP<br>DEFB1                             | ↑       | Microarray analysis                       | Teat cistern lobulo-alveolar region                    | <i>in vivo</i> -E |
| [53] | LPS                     | LAP                                             | ↑       | qRT-PCR                                   | BMECs                                                  | <i>ex vivo</i>    |
| [68] | <i>S. aureus</i>        | TAP                                             | ↓       | RT-PCR                                    | BMECs                                                  | <i>ex vivo</i>    |
| [48] | <i>S. aureus</i>        | DEFB1<br>DEFB4<br>DEFB5                         | ↑       | qRT-PCR                                   | Alveolar, ductal, gland cistern and teat canal regions | <i>in vivo</i> -E |
|      |                         | LAP<br>TAP                                      | ↔       |                                           |                                                        |                   |
| [90] | LPS                     | LAP                                             | ↑       | RT-PCR                                    | BMECs                                                  | <i>ex vivo</i>    |
| [97] | <i>S. aureus</i>        | TAP<br>BNBD5                                    | ↑       | qRT-PCR                                   | BMECs                                                  | <i>ex vivo</i>    |
| [27] | <i>S. aureus</i>        | LAP<br>TAP<br>DEFB1<br>BNBD5<br>BNBD10          | ↑       | qRT-PCR                                   | BMECs                                                  | <i>ex vivo</i>    |
| [98] | <i>S. aureus</i>        | LAP<br>TAP<br>DEFB1<br>BNBD4<br>BNBD5<br>BNBD10 | ↑       | qRT-PCR                                   | BMECs                                                  | <i>ex vivo</i>    |
|      |                         |                                                 | ↔       |                                           |                                                        |                   |

|      |                                                                                 |                                                                                             |                                               |                                      |                           |                   |
|------|---------------------------------------------------------------------------------|---------------------------------------------------------------------------------------------|-----------------------------------------------|--------------------------------------|---------------------------|-------------------|
| [74] | <i>E. coli</i><br><i>S. aureus</i>                                              | BNBD5                                                                                       | ↑<br>(Response to <i>S. aureus</i> was lower) | qRT-PCR                              | BMECs                     | <i>ex vivo</i>    |
| [18] | <i>S. aureus</i><br><i>S. bovis</i><br><i>S. dysgalactiae</i><br><i>E. coli</i> | LAP                                                                                         | ↑                                             | ELISA                                | Milk                      | <i>in vivo</i> -N |
| [79] | <i>E. coli</i><br><i>S. aureus</i>                                              | LAP<br>TAP                                                                                  | ↑                                             | Microfluidic high-throughput RT-qPCR | BMECs extracted from milk | <i>ex vivo</i>    |
| [40] | <i>S. aureus</i> -<br>coagulase- positive and<br>coagulase-negative             | LAP<br>DEFB1<br>BNBD4<br>BNBD5<br>BNBD10<br>TAP                                             | ↑<br><br><br><br><br>No detected              | qRT-PCR                              | Parenchyma                | <i>in vivo</i> -N |
| [75] | <i>S. aureus</i>                                                                | LAP<br>TAP<br>BNBD5<br>BNBD10                                                               | ↑<br><br><br>↔                                | qRT-PCR                              | BMECs                     | <i>ex vivo</i>    |
| [80] | LPS                                                                             | LAP<br>TAP<br>EBD<br>BNBD1<br>BNBD5<br>BNBD3<br>BNBD4<br>BNBD6<br>BNBD7<br>BNBD10<br>BNBD13 | ↑                                             | qRT-PCR                              | BMECs                     | <i>ex vivo</i>    |
| [66] | <i>S. aureus</i>                                                                | LAP<br>TAP<br>DEFB1<br>BNBD4<br>BNBD5                                                       | ↔                                             | qRT-PCR                              | BMECs                     | <i>ex vivo</i>    |

| BNBD10 |                                                                    |                                    |        |                |                                         |                   |
|--------|--------------------------------------------------------------------|------------------------------------|--------|----------------|-----------------------------------------|-------------------|
| [62]   | <i>E. coli</i>                                                     | LAP                                | ↑      | qRT-PCR        | The teat cistern                        | <i>in vivo</i> -E |
|        | <i>S. aureus</i>                                                   |                                    | ↔      |                |                                         |                   |
| [64]   | LPS                                                                | LAP                                | ↑      | qRT-PCR        | Sections of heifer udders               | <i>ex vivo</i>    |
|        | LTA<br><i>S. aureus</i>                                            |                                    | ↔      |                |                                         |                   |
| [84]   | <i>S. aureus</i>                                                   | TAP<br>BNBD5                       | ↑      | qRT-PCR        | BMECs                                   | <i>ex vivo</i>    |
| [86]   | <i>S. aureus</i>                                                   | DEFB1<br>TAP<br>LAP                | ↑      | qRT-PCR        | BMECs                                   | <i>ex vivo</i>    |
| [81]   | <i>E. coli</i>                                                     | BNBD5                              | ↑      | qRT-PCR        | BMECs                                   | <i>ex vivo</i>    |
| [83]   | LPS                                                                | BNBD5                              | ↑      | ELISA          | BMECs                                   | <i>ex vivo</i>    |
|        |                                                                    |                                    | ↔      | qRT-PCR        | BMECs                                   | <i>ex vivo</i>    |
|        | <i>E. coli</i>                                                     | TAP<br>BNBD                        | ↑<br>↔ | qRT-PCR        |                                         |                   |
| [59]   | Clinical mastitis                                                  | DEFB1<br>DEFB4A<br>DEFB7<br>DEFB10 | ↑      | RNA sequencing | Circulating leukocytes                  | <i>in vivo</i> -N |
|        | Subclinical mastitis                                               | DEFB1<br>DEFB4A<br>DEFB7<br>DEFB10 | ↔      |                |                                         |                   |
| [60]   | <i>E. coli</i>                                                     | β-defensins                        | ↑      | RNA sequencing | Circulating Leukocytes                  | <i>in vivo</i> -N |
| [67]   | <i>S. aureus</i>                                                   | LAP                                | ↔      | qRT-PCR        | Precision-cut bovine udder slices/BMECs | <i>ex vivo</i>    |
| [49]   | Clinical mastitis                                                  | DEFB4                              | ↑      | ELISA          | Serum                                   | <i>in vivo</i> -N |
|        | ( <i>E. coli</i><br><i>S. uberis</i> )                             |                                    | ↔      |                | Milk                                    |                   |
|        | Subclinical mastitis                                               |                                    | ↓      |                | Serum                                   |                   |
|        | ( <i>S. aureus</i><br><i>S. uberis</i><br><i>S. dysgalactiae</i> ) |                                    | ↓      |                | Milk                                    |                   |

<sup>1</sup> LAP: Lingual antimicrobial peptide; TAP: Tracheal antimicrobial peptide; BNBD: Bovine neutrophil  $\beta$ -defensins [Alternative names of BNBD1-13 genes are DEFB1-13.  
<sup>2</sup>real-time PCR. <sup>3</sup>Incidence of infection naturally. <sup>4</sup>  $\uparrow$ : Upregulated;  $\leftrightarrow$ : No change;  $\downarrow$ : Downregulated. <sup>5</sup>Incidence of infection experimentally. <sup>6</sup> quantitative real-time PCR.  
<sup>7</sup>BMECs: Bovine mammary epithelial cells.
